# Supplementary material
Source: PubMed Central journal article supplement (PMC5850604)
Supplement: dex252tablesi.pdf [file dex252tablesi.pdf]

**Table S1** The 128 genes identified as differentially expressed by microarray comparison of the 40 mg dose group with either the 2.5 or 5 mg dose groups. Note there are 182 genes listed here as one gene was (MOXD1) was represented twice on the array.

| Gene name                                                                                                  | Comparison dose (mg) |
|------------------------------------------------------------------------------------------------------------|----------------------|
| Arrestin domain containing 4 (ARRDC4)                                                                      | 10                   |
| Cadherin 13, H-cadherin (heart) (CDH13)                                                                    | 10                   |
| Collagen, type IV, alpha 5 (COL4A5), transcript variant 2                                                  | 10                   |
| Cytochrome P450, family 4, subfamily B, polypeptide 1 (CYP4B1), transcript variant 2                       | 10                   |
| Homeobox A10 (HOXA10), transcript variant 1                                                                | 10                   |
| Hypothetical protein FLJ21986 (FLJ21986)                                                                   | 10                   |
| KH domain containing, RNA binding, signal transduction associated 3 (KHDRBS3)                              | 10                   |
| Laminin, alpha 2 (LAMA2), transcript variant 1                                                             | 10                   |
| Monooxygenase, DBH-like 1 (MOXD1), transcript variant 2                                                    | 10                   |
| Vasoactive intestinal peptide receptor 2 (VIPR2)                                                           | 10                   |
| NAD(P)H dehydrogenase, quinone 1 (NQO1), transcript variant 1                                              | 10                   |
| Solute carrier family 39 (zinc transporter), member 8 (SLC39A8)                                            | 10                   |
| Sulfatase 1 (SULF1)                                                                                        | 10                   |
| Transmembrane 4L six family member 18 (TM4SF18)                                                            | 10                   |
| Acyl-Coenzyme A oxidase 2, branched chain (ACOX2)                                                          | 10 and 40            |
| ADAM metallopeptidase with thrombospondin type 1 motif, 1 (ADAMTS1)                                        | 10 and 40            |
| CD36 molecule (thrombospondin receptor) (CD36), transcript variant 3                                       | 10 and 40            |
| Chemokine (C-X-C motif) ligand 13 (B-cell chemoattractant) (CXCL13)                                        | 10 and 40            |
| Chromosome four open reading frame 18 (C4orf18), transcript variant 2                                      | 10 and 40            |
| Collagen, type IV, alpha 6 (COL4A6), transcript variant A                                                  | 10 and 40            |
| Laminin, beta 1 (LAMB1)                                                                                    | 10 and 40            |
| LIM and cysteine-rich domains 1 (LMCD1)                                                                    | 10 and 40            |
| UDP-N-acetyl-alpha-D-galactosamine:polypeptide N-acetylgalactosaminyltransferase 13 (GalNAc-T13) (GALNT13) | 10 and 40            |
| MAM domain containing 2 (MAMDC2)                                                                           | 10 and 40            |
| Phospholipase C-like 1 (PLCL1)                                                                             | 10 and 40            |
| RPE-spondin (RPESP)                                                                                        | 10 and 40            |
| Hypothetical protein LOC144481, transcript variant 1 (LOC144481)                                           | 10 and 40            |
| AGENCOURT_13462296 NIH_MGC_187 cDNA clone IMAGE:30318122 5, mRNA sequence                                  | 40                   |
| BX093803 Soares_pregnant_uterus_NbHPU cDNA clone IMAGp998L054309, mRNA sequence                            | 40                   |
| 5,10-methylenetetrahydrofolate synthetase (5-formyltetrahydrofolate cyclo-ligase) (MTHFS)                  | 40                   |
| ADP-ribosylation factor-like 5 A (ARL5A), transcript variant 3                                             | 40                   |
| ADP-ribosylation-like factor 6 interacting protein 6 (ARL6IP6)                                             | 40                   |
| Aldehyde dehydrogenase one family, member L1 (ALDH1L1)                                                     | 40                   |
| Aldehyde oxidase 1 (AOX1)                                                                                  | 40                   |
| Anthrax toxin receptor 2 (ANTXR2)                                                                          | 40                   |
| Arylsulfatase B (ARSB), transcript variant 1                                                               | 40                   |
| Basic transcription factor 3-like 4 (BTF3L4)                                                               | 40                   |
| bolA homolog 3 ( <i>E. coli</i> ) (BOLA3), transcript variant 1                                            | 40                   |
| bolA homolog 3 ( <i>E. coli</i> ) (BOLA3), transcript variant 2                                            | 40                   |
| Brain protein 44 (BRP44)                                                                                   | 40                   |
| Ca <sup>++</sup> -dependent secretion activator 2 (CADPS2), transcript variant 1                           | 40                   |
| Calcitonin receptor-like (CALCRL)                                                                          | 40                   |
| Cartilage intermediate layer protein, nucleotide pyrophosphohydrolase (CILP)                               | 40                   |
| CASP2 and RIPK1 domain containing adapter with death domain (CRADD)                                        | 40                   |
| cDNA FLJ13598 fis, clone PLACE1009921                                                                      | 40                   |

Continued

**Table SI** *Continued*

| <b>Gene name</b>                                                                                                             | <b>Comparison dose (mg)</b> |
|------------------------------------------------------------------------------------------------------------------------------|-----------------------------|
| cDNA FLJ37143 fis, clone BRACE2024222                                                                                        | 40                          |
| Ceruloplasmin (ferroxidase) (CP)                                                                                             | 40                          |
| Chloride intracellular channel 6 (CLIC6)                                                                                     | 40                          |
| Chondrolectin (CHODL)                                                                                                        | 40                          |
| Chromatin modifying protein 5 (CHMP5)                                                                                        | 40                          |
| Chromosome 17 open reading frame 58 (C17orf58), transcript variant 2                                                         | 40                          |
| Chromosome 3 open reading frame 14 (C3orf14)                                                                                 | 40                          |
| Chromosome 4 open reading frame 34 (C4orf34)                                                                                 | 40                          |
| COBL-like 1 (COBLL1)                                                                                                         | 40                          |
| Coenzyme Q2 homolog, prenyltransferase (yeast) (COQ2)                                                                        | 40                          |
| PREDICTED: hypothetical protein LOC145837, transcript variant 2 (LOC145837)                                                  | 40                          |
| PREDICTED: hypothetical protein LOC644571 (LOC644571)                                                                        | 40                          |
| Collagen, type IX, alpha 2 (COL9A2)                                                                                          | 40                          |
| Collapsin response mediator protein 1 (CRMP1), transcript variant 1                                                          | 40                          |
| COMM domain containing 10 (COMMD10)                                                                                          | 40                          |
| COMM domain containing 8 (COMMD8)                                                                                            | 40                          |
| Cornichon homolog (Drosophila) (CNIH)                                                                                        | 40                          |
| Cornichon homolog (Drosophila) (CNIH), transcript variant 2                                                                  | 40                          |
| Crystallin, alpha B (CRYAB)                                                                                                  | 40                          |
| Cysteine-rich PDZ-binding protein (CRIPT)                                                                                    | 40                          |
| Cytokine receptor-like factor 3 (CRLF3)                                                                                      | 40                          |
| Dapper, antagonist of beta-catenin, homolog 2 (Xenopus laevis) (DACT2)                                                       | 40                          |
| Dedicator of cytokinesis 10 (DOCK10)                                                                                         | 40                          |
| Dedicator of cytokinesis 2 (DOCK2)                                                                                           | 40                          |
| Dedicator of cytokinesis 8 (DOCK8)                                                                                           | 40                          |
| Degenerative spermatocyte homolog 1, lipid desaturase (Drosophila) (DEGS1), transcript variant 1                             | 40                          |
| DEP domain containing 6 (DEPDC6)                                                                                             | 40                          |
| Dickkopf homolog 1 (Xenopus laevis) (DKK1)                                                                                   | 40                          |
| Dipeptidyl-peptidase 6 (DPP6), transcript variant 1                                                                          | 40                          |
| DnaJ (Hsp40) homolog, subfamily C, member 15 (DNAJC15)                                                                       | 40                          |
| DPH3, KTI11 homolog (S. cerevisiae) (DPH3), transcript variant 2                                                             | 40                          |
| Dynamin 1-like (DNM1L), transcript variant 1                                                                                 | 40                          |
| ELOVL family member 5, elongation of long chain fatty acids (FEN1 / Elo2, SUR4/ Elo3-like, yeast) (ELOVL5)                   | 40                          |
| Endothelin receptor type B (EDNRB), transcript variant 1                                                                     | 40                          |
| Fc fragment of IgE, high affinity I, receptor for; gamma polypeptide (FCER1G)                                                | 40                          |
| Fibrinogen-like 2 (FGL2)                                                                                                     | 40                          |
| Formin homology 2 domain containing 3 (FHOD3)                                                                                | 40                          |
| Fumarylacetoacetate hydrolase domain containing 1 (FAHD1), nuclear gene encoding mitochondrial protein, transcript variant 1 | 40                          |
| G protein-coupled bile acid receptor 1 (GPBAR1), transcript variant 1                                                        | 40                          |
| G protein-coupled bile acid receptor 1 (GPBAR1), transcript variant 3                                                        | 40                          |
| Gamma-glutamyl hydrolase (conjugase, folylpolyglutamyl hydrolase) (GGH)                                                      | 40                          |
| Glutamyl aminopeptidase (aminopeptidase A) (ENPEP)                                                                           | 40                          |
| Glycerophosphodiester phosphodiesterase domain containing 5 (GDPD5)                                                          | 40                          |
| GTPase, IMAP family member 4 (GIMAP4)                                                                                        | 40                          |
| Guanine nucleotide binding protein (G protein), alpha inhibiting activity polypeptide 1 (GNAI1)                              | 40                          |
| hCG1995786 (LOC653147)                                                                                                       | 40                          |
| Histamine N-methyltransferase (HNMT), transcript variant 2                                                                   | 40                          |

*Continued*

**Table S1** *Continued*

| Gene name                                                                                                                                                                        | Comparison dose (mg) |
|----------------------------------------------------------------------------------------------------------------------------------------------------------------------------------|----------------------|
| Histidine ammonia-lyase (HAL)                                                                                                                                                    | 40                   |
| Histone cluster 1, H2ac (HIST1H2AC)                                                                                                                                              | 40                   |
| Homeobox C6 (HOXC6), transcript variant 1                                                                                                                                        | 40                   |
| Hypothetical protein MGC16169 (MGC16169)                                                                                                                                         | 40                   |
| Immunoglobulin superfamily containing leucine-rich repeat 2 (ISLR2)                                                                                                              | 40                   |
| Integral membrane protein 2 A (ITM2A)                                                                                                                                            | 40                   |
| KDEL (Lys-Asp-Glu-Leu) containing 2 (KDEL2)                                                                                                                                      | 40                   |
| KIAA0101 (KIAA0101), transcript variant 1                                                                                                                                        | 40                   |
| Killer cell immunoglobulin-like receptor, 2 domains, long cytoplasmic tail, five A (KIR2DL5A)                                                                                    | 40                   |
| Killer cell lectin-like receptor subfamily C, member 1 (KLRC1), transcript variant 4                                                                                             | 40                   |
| Kinesin family member 20 A (KIF20A)                                                                                                                                              | 40                   |
| Kruppel-like factor 4 (gut) (KLF4)                                                                                                                                               | 40                   |
| Lactamase, beta 2 (LACTB2)                                                                                                                                                       | 40                   |
| Leptin receptor (LEPR), transcript variant 2                                                                                                                                     | 40                   |
| Leucine-rich repeat transmembrane neuronal 1 (LRRTM1)                                                                                                                            | 40                   |
| Leucine-rich repeats and immunoglobulin-like domains 3 (LRIG3)                                                                                                                   | 40                   |
| Lipase A, lysosomal acid, cholesterol esterase (LIPA), transcript variant 2                                                                                                      | 40                   |
| Membrane-spanning 4-domains, subfamily A, member 6 A (MS4A6A), transcript variant 2                                                                                              | 40                   |
| Methylenetetrahydrofolate dehydrogenase (NADP+ dependent) 2, methenyltetrahydrofolate cyclohydrolase (MTHFD2), nuclear gene encoding mitochondrial protein, transcript variant 2 | 40                   |
| Nibrin (NBN)                                                                                                                                                                     | 40                   |
| Nicotinamide N-methyltransferase (NNMT)                                                                                                                                          | 40                   |
| Nitric oxide synthase trafficker (NOSTRIN), transcript variant 1                                                                                                                 | 40                   |
| Nucleobindin 2 (NUCB2)                                                                                                                                                           | 40                   |
| Nucleoside phosphorylase (NP)                                                                                                                                                    | 40                   |
| Osteomodulin (OMD)                                                                                                                                                               | 40                   |
| Peptidylprolyl isomerase C (cyclophilin C) (PPIC)                                                                                                                                | 40                   |
| Perforin 1 (pore forming protein) (PRF1), transcript variant 1                                                                                                                   | 40                   |
| Peroxiredoxin 3 (PRDX3), nuclear gene encoding mitochondrial protein, transcript variant 1                                                                                       | 40                   |
| Phosphatidic acid phosphatase type 2B (PPAP2B), transcript variant 2                                                                                                             | 40                   |
| Phospholipase A2, group IIA (platelets, synovial fluid) (PLA2G2A)                                                                                                                | 40                   |
| Phosphoribosyl pyrophosphate synthetase 2 (PRPS2), transcript variant 1                                                                                                          | 40                   |
| Phytanoyl-CoA 2-hydroxylase interacting protein-like (PHYHIPL)                                                                                                                   | 40                   |
| Plastin 1 (I isoform) (PLS1)                                                                                                                                                     | 40                   |
| Pleckstrin (PLEK)                                                                                                                                                                | 40                   |
| Prenylcysteine oxidase 1 (PCYOX1)                                                                                                                                                | 40                   |
| Prion protein (PRNP), transcript variant 2                                                                                                                                       | 40                   |
| Procollagen-lysine, 2-oxoglutarate 5-dioxygenase 2 (PLOD2), transcript variant 2                                                                                                 | 40                   |
| Progesterin and adipoQ receptor family member III (PAQR3)                                                                                                                        | 40                   |
| Proliferating cell nuclear antigen (PCNA), transcript variant 2                                                                                                                  | 40                   |
| Prostaglandin E receptor 2 (subtype EP2), 53 kDa (PTGER2)                                                                                                                        | 40                   |
| Proteasome (prosome, macropain) subunit, alpha type, 3 (PSMA3), transcript variant 2                                                                                             | 40                   |
| Protein tyrosine phosphatase-like A domain containing 1 (PTPLAD1)                                                                                                                | 40                   |
| Rac/ Cdc42 guanine nucleotide exchange factor (GEF) 6 (ARHGEF6)                                                                                                                  | 40                   |
| Ras-related C3 botulinum toxin substrate 2 (rho family, small GTP binding protein Rac2) (RAC2)                                                                                   | 40                   |
| RNA terminal phosphate cyclase domain 1 (RTCD1)                                                                                                                                  | 40                   |
| Scavenger receptor class A, member 5 (putative) (SCARA5)                                                                                                                         | 40                   |

*Continued*

**Table SI** *Continued*

| <b>Gene name</b>                                                                                                                                         | <b>Comparison dose (mg)</b> |
|----------------------------------------------------------------------------------------------------------------------------------------------------------|-----------------------------|
| Scinderin (SCIN)                                                                                                                                         | 40                          |
| Sema domain, seven thrombospondin repeats (type I and type I-like), transmembrane domain (TM) and short cytoplasmic domain, (semaphorin) five A (SEMA5A) | 40                          |
| Serglycin (SRGN)                                                                                                                                         | 40                          |
| Serine palmitoyltransferase, long chain base subunit 3 (SPTLC3)                                                                                          | 40                          |
| Shisa homolog 3 ( <i>Xenopus laevis</i> ) (SHISA3)                                                                                                       | 40                          |
| Similar to RIKEN cDNA 2310016C16 (LOC493869)                                                                                                             | 40                          |
| Slit homolog 3 ( <i>Drosophila</i> ) (SLIT3)                                                                                                             | 40                          |
| Snail homolog 2 ( <i>Drosophila</i> ) (SNAI2)                                                                                                            | 40                          |
| Sodium channel, nonvoltage-gated I, beta (SCNN1B)                                                                                                        | 40                          |
| Sodium channel, nonvoltage-gated I, gamma (SCNN1G)                                                                                                       | 40                          |
| Solute carrier family 1 (neuronal epithelial high affinity glutamate transporter, system Xag), member 1 (SLC1A1)                                         | 40                          |
| Solute carrier family 25, member 43 (SLC25A43)                                                                                                           | 40                          |
| Solute carrier family 29 (nucleoside transporters), member 4 (SLC29A4)                                                                                   | 40                          |
| STE20-like kinase (yeast) (SLK)                                                                                                                          | 40                          |
| Sterol-C5-desaturase (ERG3 delta-5-desaturase homolog, <i>S. cerevisiae</i> )-like (SC5DL), transcript variant 1                                         | 40                          |
| Stomatin (STOM), transcript variant 1                                                                                                                    | 40                          |
| Succinate dehydrogenase complex, subunit D, integral membrane protein (SDHD), nuclear gene encoding mitochondrial protein                                | 40                          |
| Suppressor of cytokine-signaling 2 (SOCS2)                                                                                                               | 40                          |
| Sushi-repeat-containing protein, X-linked (SRPX)                                                                                                         | 40                          |
| Tandem C2 domains, nuclear (TC2N)                                                                                                                        | 40                          |
| TEK tyrosine kinase, endothelial (venous malformations, multiple cutaneous and mucosal) (TEK)                                                            | 40                          |
| Thymidylate synthetase (TYMS)                                                                                                                            | 40                          |
| Transcription elongation factor A (SII)-like 1 (TCEAL1), transcript variant 2                                                                            | 40                          |
| Transforming growth factor, beta receptor II (70/80 kDa) (TGFBR2), transcript variant 1                                                                  | 40                          |
| Transmembrane emp24 protein transport domain containing 5 (TMED5)                                                                                        | 40                          |
| Transmembrane emp24 protein transport domain containing 7 (TMED7)                                                                                        | 40                          |
| Transmembrane protein 126A (TMEM126A)                                                                                                                    | 40                          |
| Transmembrane protein 45A (TMEM45A)                                                                                                                      | 40                          |
| Ubiquitin-like with PHD and ring finger domains 1 (UHRF1), transcript variant 1                                                                          | 40                          |
| V-set domain containing T cell activation inhibitor 1 (VTCN1)                                                                                            | 40                          |
| von Hippel-Lindau binding protein 1 (VBP1)                                                                                                               | 40                          |
| WAP four-disulfide core domain 2 (WFDC2), transcript variant 2                                                                                           | 40                          |
| Zinc finger, MYM-type 6 (ZMYM6)                                                                                                                          | 40                          |
| PREDICTED: claudin 22 (CLDN22)                                                                                                                           | 40                          |
| PREDICTED: hypothetical LOC401397 (LOC401397)                                                                                                            | 40                          |
| Chromosome 17 open reading frame 58 (C17orf58), transcript variant 2                                                                                     | 40                          |
| Chromosome 4 open reading frame 18 (C4orf18), transcript variant 2                                                                                       | 40                          |
| Dynamin 1-like (DNM1L), transcript variant 1                                                                                                             | 40                          |
| Leptin receptor (LEPR), transcript variant 2                                                                                                             | 40                          |
| Sema domain, seven thrombospondin repeats (type I and type I-like), transmembrane domain (TM) and short cytoplasmic domain, (semaphorin) 5A (SEMA5A)     | 40                          |
| Serine palmitoyltransferase, long chain base subunit 3 (SPTLC3)                                                                                          | 40                          |
| Sodium channel, nonvoltage-gated I, gamma (SCNN1G)                                                                                                       | 40                          |
| TEK tyrosine kinase, endothelial (venous malformations, multiple cutaneous and mucosal) (TEK)                                                            | 40                          |
| Transcription elongation factor A (SII)-like 1 (TCEAL1), transcript variant 2                                                                            | 40                          |
