# Supplementary material
Source: PubMed Central journal article supplement (PMC5850604)
Supplement: dex252tablesii.pdf [file dex252tablesii.pdf]

**Table SII Probe-primers used for microarray validation.**

| <b>Gene symbol</b>                                                                                              | <b>Applied biosystems Cat#</b> |
|-----------------------------------------------------------------------------------------------------------------|--------------------------------|
| BCL6 – B-cell CLL/lymphoma 6                                                                                    | Hs00153368-m1                  |
| CLEC1A - C-type lectin domain family 1, member A                                                                | Hs00212933-m1                  |
| CLIC6 - Chloride Intracellular Channel 6                                                                        | Hs00401339-m1                  |
| CXCL13 - chemokine (C-X-C motif) ligand 13                                                                      | Hs00892618-m1                  |
| CXCL14 - chemokine (C-X-C motif) ligand 14                                                                      | Hs01557413-m1                  |
| DAF (CD55)-DAF for complement                                                                                   | Hs00892618-m1                  |
| DKK1 - dickkopf WNT signaling pathway inhibitor 1                                                               | Hs00183740-m1                  |
| GPI30-glycoprotein 130                                                                                          | Hs00174360-m1                  |
| HOXA10 - Homeobox A10                                                                                           | Hs00172012-m1                  |
| IL-15-interleukin-15                                                                                            | Hs01003716-m1                  |
| LIF-leukemia inhibitory factor                                                                                  | Hs00171455-m1                  |
| LCN2 - Lipocalin                                                                                                | Hs01008571-m1                  |
| MIG-6-mitogen-inducible gene 6 protein; receptor-associated late transducer/ ERBB receptor feedback inhibitor 1 | Hs00219060-m1                  |
| OGN - Osteoglycin                                                                                               | Hs00247901-m1                  |
| SLC15A1 - Solute Carrier Family 15 (Oligo peptide transporter), member 1                                        | Hs00953898-m1                  |
| SPPI -osteopontin/ secreted phosphoprotein 1                                                                    | Hs00959010-m1                  |
| VNIR4 - Vomeronasal one Receptor 4                                                                              | Hs00545203-s1                  |
| VNN1 – Vanin 1                                                                                                  | Hs01546812-m1                  |
| PPIA-peptidylprolyl isomerase A                                                                                 | Hs99999904-m1                  |
